# Supplementary material for: Hedgehog signaling and Tre1 regulate actin dynamics through PI(4,5)P2 to direct migration of Drosophila embryonic germ cells
Source: PubMed Central journal article supplement — Cell Rep. Author manuscript; Available in PMC 2021 Apr 6. (PMC8023404; doi:10.1016/j.celrep.2021.108799), 2021-03-02
Supplement: NIHMS1679672-supplement-1.pdf [file NIHMS1679672-supplement-1.pdf]

Cell Reports, Volume 34

## Supplemental information

**Hedgehog signaling and Tre1 regulate  
actin dynamics through PI(4,5)P<sub>2</sub> to direct  
migration of *Drosophila* embryonic germ cells**

**Ji Hoon Kim, Caitlin D. Hanlon, Sunaina Vohra, Peter N. Devreotes, and Deborah J. Andrew**

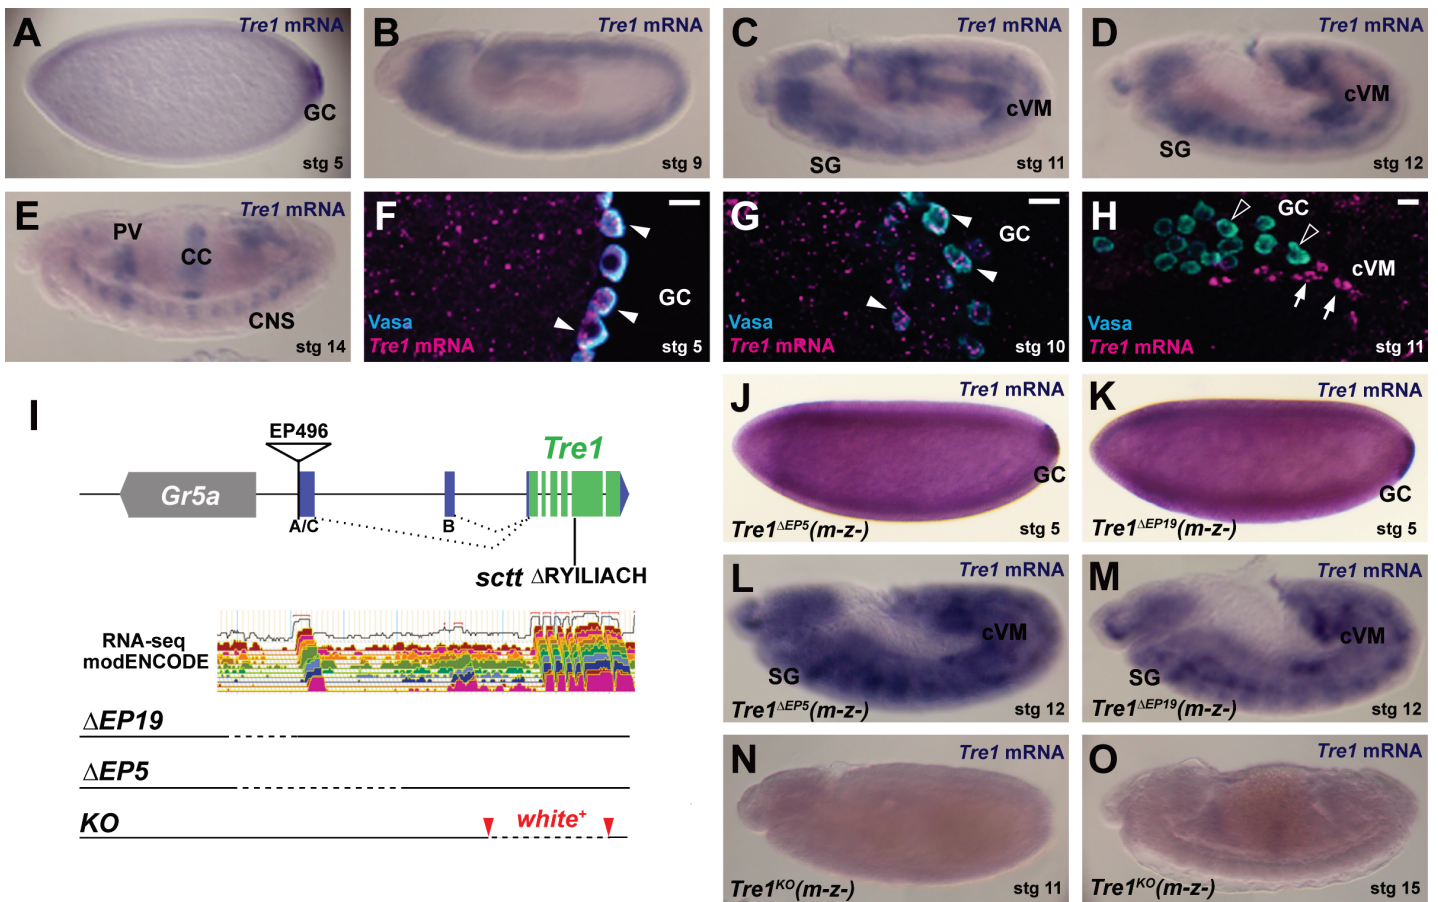

**Figure S1. Expression of *Tre1* in Drosophila embryos and Generation of a *Tre1* null allele by homologous recombination.** (A-E) in situ hybridization revealed *Tre1* mRNA expression in GCs, caudal visceral mesoderm (cVM), salivary gland (SG), proventriculus (PV), copper cells (CC) and central nervous system (CNS) in stage (stg) 5 – 14 embryos. (F-H) *Tre1* mRNA in GCs (F,G) and cVM (H) visualized by fluorescent in situ hybridization. GCs were marked by Vasa staining. (F,G) *Tre1* mRNA is present in the GCs up through the time when they exit the endoderm during stage 10. (H) *Tre1* mRNA is no longer detected in GCs for most of their migration; the nearby signals observed at stage 11 correspond to expression in the caudal visceral mesoderm. Nonetheless, bioinformatic analysis estimates that the corresponding *Tre1* protein would remain present for the duration of GC migration (Expasy ProtParam). Scale bars, 10  $\mu$ m. (I) *Tre1* gene structure. Existing *Tre1* alleles include two derived from the excision of P

element EP496 ( $\Delta$ EP19 and  $\Delta$ EP5) and one (*sctt*) that deletes eight residues including the RY residues of the critical NRY motif. A null allele in which the entire ORF is replaced with the *white+* eye color gene was generated using homologous recombination. Dotted lines indicate region deleted. (J-O) *Tre1* mRNA in situ hybridization. The  $\Delta$ EP19 and  $\Delta$ EP5 alleles make easily detectable *Tre1* transcript in GCs (J,K) and other tissues (L,M), whereas the KO allele does not (N,O). Related to Figure 1.

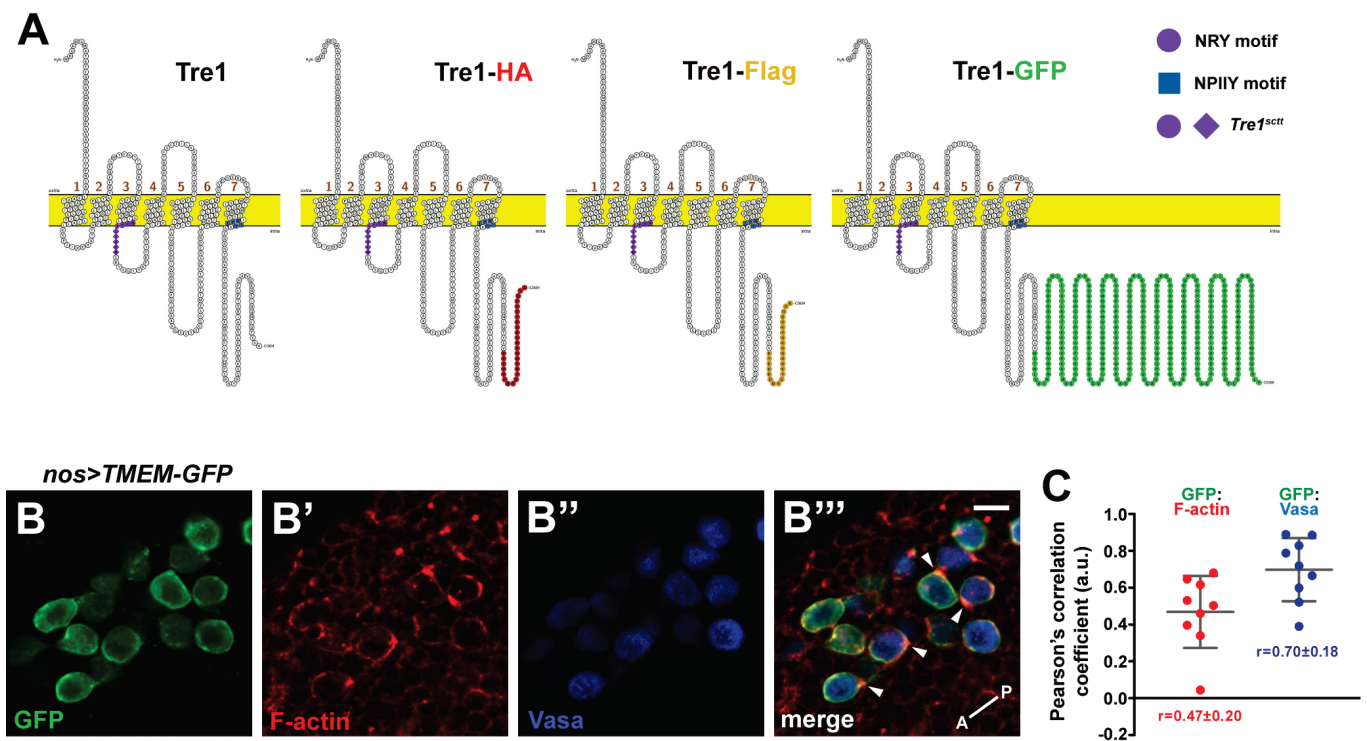

**Figure S2. Ribbon diagrams of untagged and C-terminally tagged versions of Tre1, showing motifs and relative lengths of the different tags.** (A) Cartoons show the ribbon structure of Tre1 and the relative length of the C-terminal tags HA (red), FLAG (gold), and GFP (Green). Yellow indicates the plasma membrane. Outside the cell is up, inside is down. Also indicated are the NRY motif (purple filled circles) and the NPIIY motif (blue squares). The *Tre1<sup>sc<sup>t</sup></sup>* allele deletes the NRY domain (purple filled circles) and a few nearby residues (purple filled diamonds). (B-B'') GCs with *nos*-Gal4 driven expression of a plasma membrane marker TMEM-GFP stained for GFP (B), F-actin (B'), VASA (A'') and merge (B'''). Note that GFP signals (green) are not proportionally increased with F-actin signals (red) at protrusions (arrowheads) in comparison with other plasma membrane areas. The embryo in dorsal view and the A-P axis indicated. (C) The Pearson's correlation coefficients between fluorescent signals from GC boundaries in B'''. Related to Figure 2.

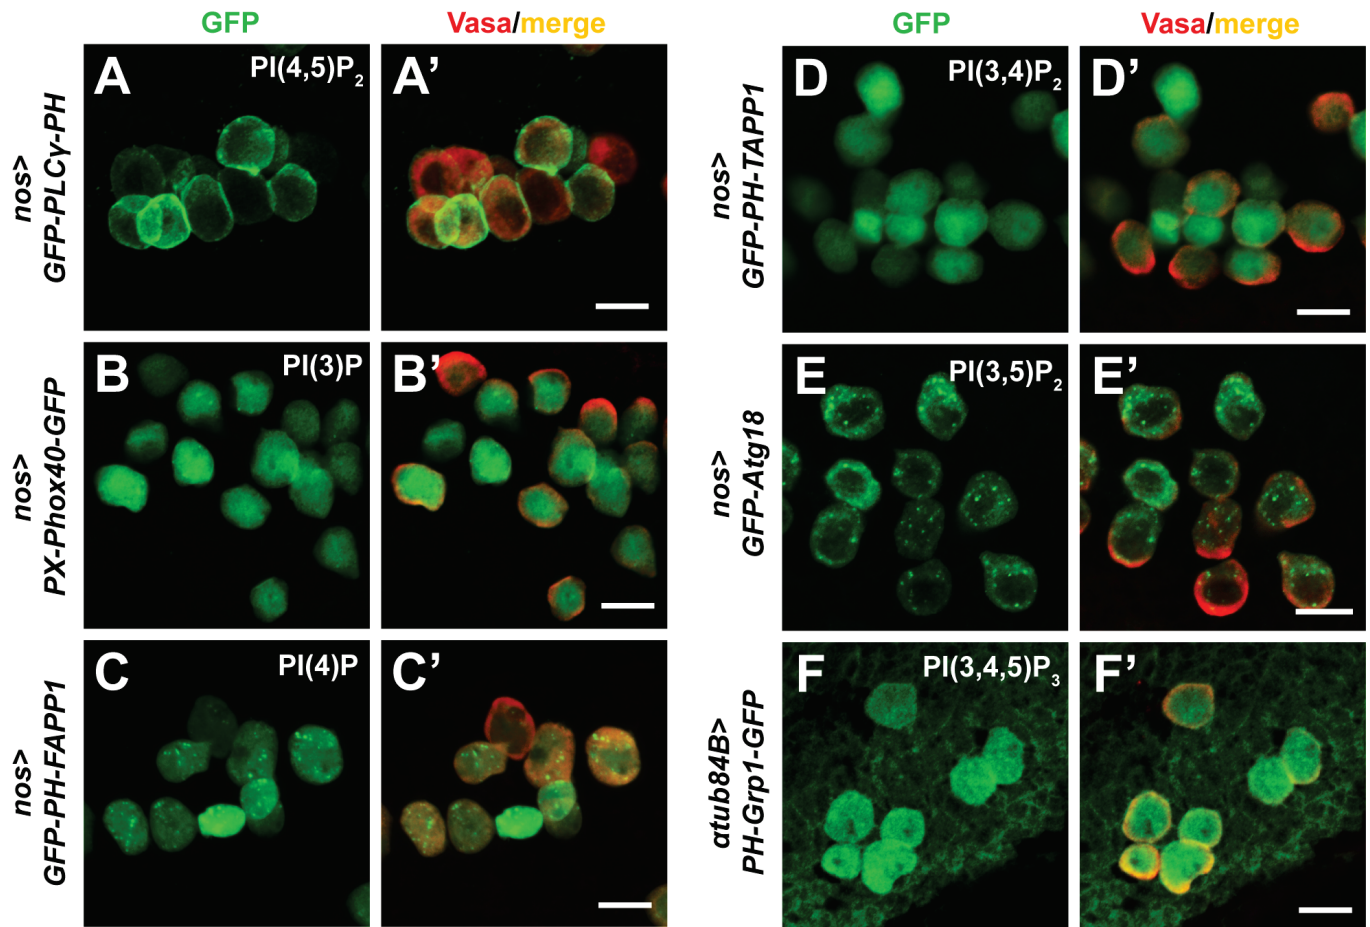

**Figure S3. PI sensors localize to different cellular domains in migrating GCs.** (A-F') GC (stained with Vasa, red) expression of GFP-tagged phosphoinositide sensors driven by nos-Gal4. (A-A') GFP-PLC $\gamma$ -PH, a PI(4,5)P<sub>2</sub> sensor. (B-B') PX-Phox40-GFP, a PI(3)P sensor. (C-C') GFP-PH-FAPP1, a PI(4)P sensor. (D-D') GFP-PH-TAPP1, a PI(3,4)P<sub>2</sub> sensor. (E-E') GFP-ATG18, a PI(3,5)P<sub>2</sub> sensor. (F-F') PH-Grp1, a PI(3,4,5)P<sub>3</sub> sensor. All GC images are from st 11 embryos. Scale bars, 10  $\mu$ m. Related to Figure 2.

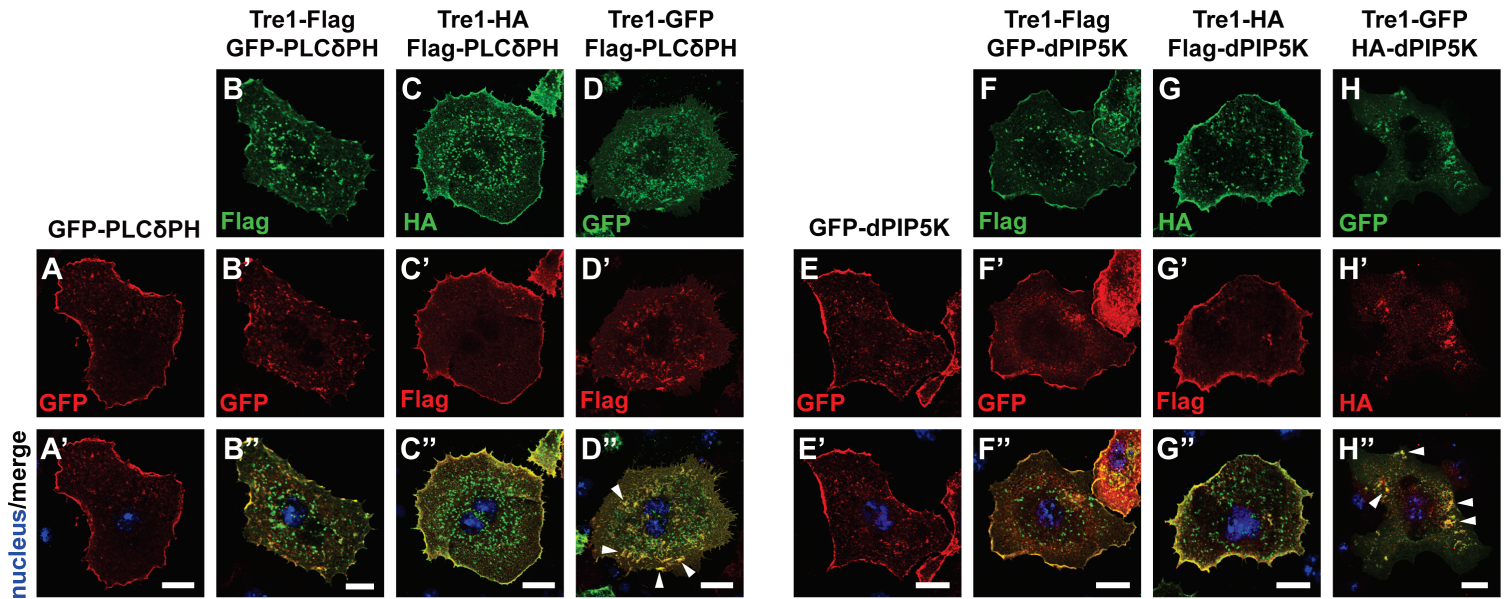

**Figure S4. PI(4,5)P<sub>2</sub> sensor and dPIP5K colocalize with Tre1-GFP in large intracellular punctae but colocalize with Tre1-Flag or Tre1-HA only at the plasma membrane. (A-D'')** Colocalization of the PI(4,5)P<sub>2</sub> sensor is seen with plasma-membrane localized Tre1-Flag and Tre1-HA, whereas colocalization is observed in large intracellular puncta with Tre1-GFP (arrowhead in D''). (E-H'') Colocalization of the dPIP5K is seen with plasma-membrane localized Tre1-Flag and Tre1-HA, whereas colocalization is observed in large intracellular puncta with Tre1-GFP (arrowheads in H''). Scale bars, 10 μm. Related to Figure 2.

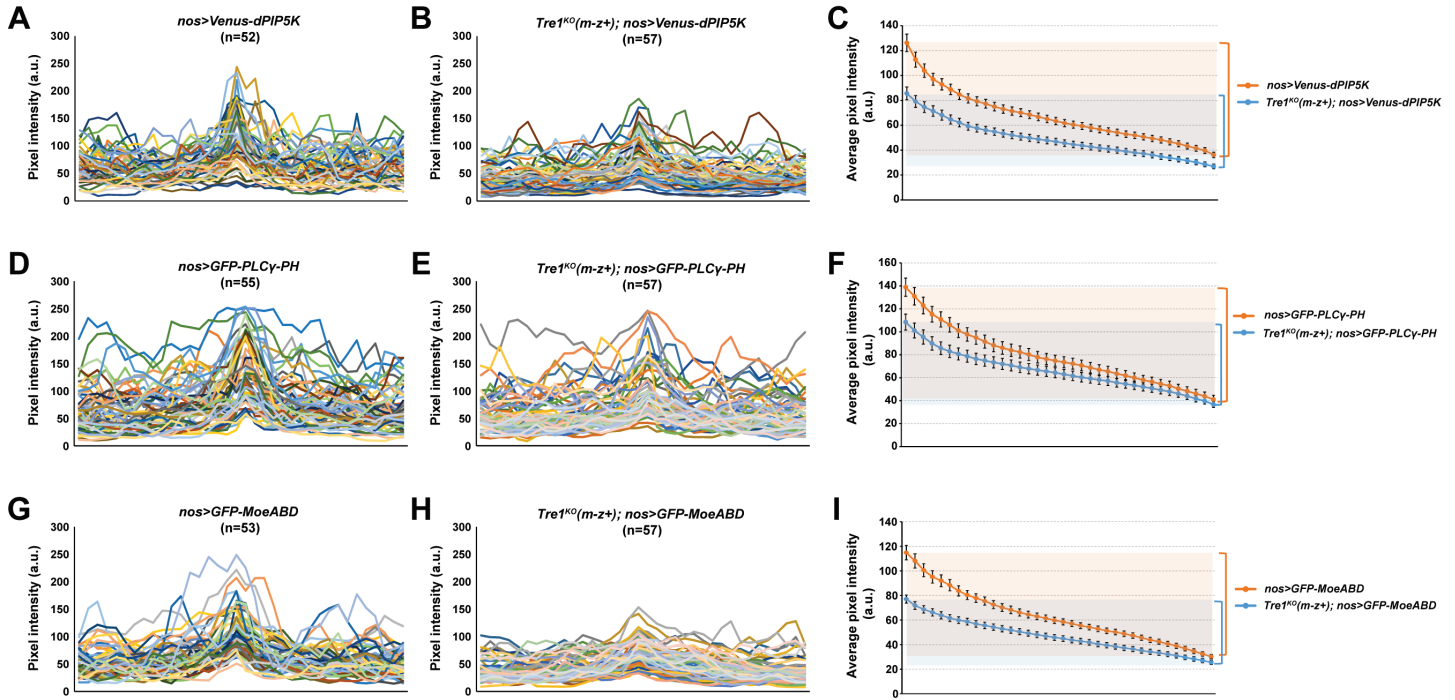

**Figure S5. *Tre1* mutant GCs display decreased polarization of dPIP5K, PI(4,5)P<sub>2</sub> and F-actin.** The line scans of fluorescent intensity of Venus-dPIP5K (A,B), GFP-PLCγPH (D,E), and GFP-MoeABD (G,H) from individual GCs are presented. Note that the majorities of WT GCs (A,D,G) display a single prominent peak whereas less peaks are present in *Tre1* mutant GCs (B,E,H). (C,F,I) The average intensity of fluorescent signals is aligned from the highest to the lowest. The ranges from the highest to the lowest points are greater in WT (orange line) than in *Tre1* mutants (blue line) indicating that *Tre1* mutant GCs do not have high local concentrations of dPIP5K, PI(4,5)P<sub>2</sub> and F-actin. Error bars represent standard deviation. Related to Figure 3.

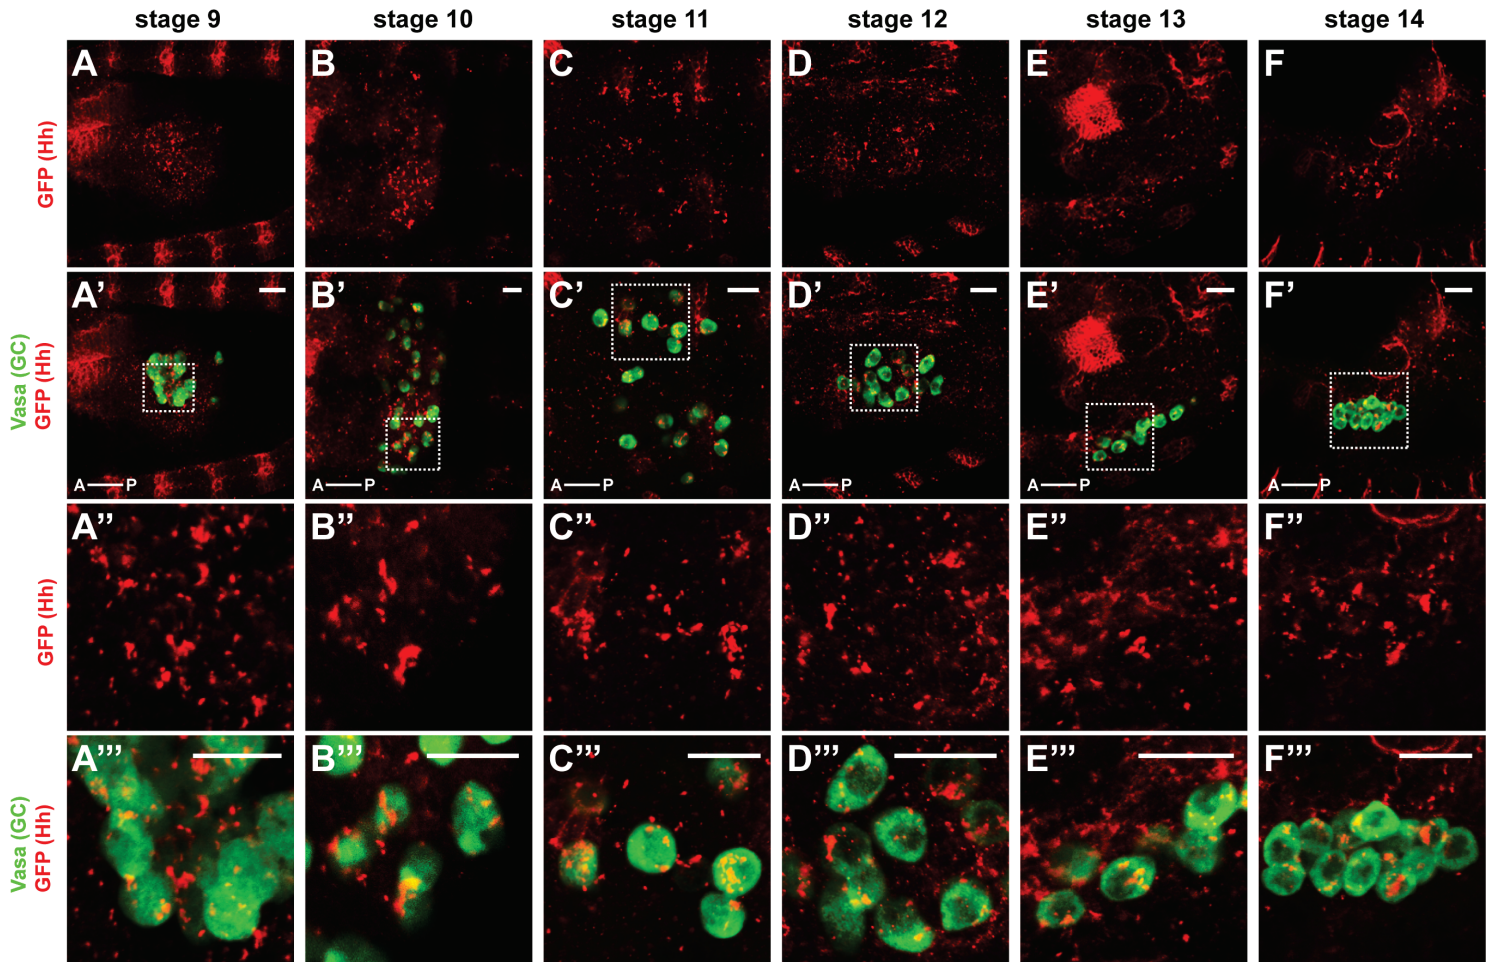

**Figure S6. Hh expression through stages of GC navigation.** GFP-tagged Hh proteins were expressed from a Bac transgene recapitulating the endogenous expression and stained with anti-GFP antibody (red). GCs were visualized by anti-Vasa staining (green). The boxed area in A'-F' were magnified in A''-F''', correspondingly. All images are a single optical slice and were taken in dorsal view. The A-P axis indicated. Scale bars, 20  $\mu$ m. Related to Figure 5.



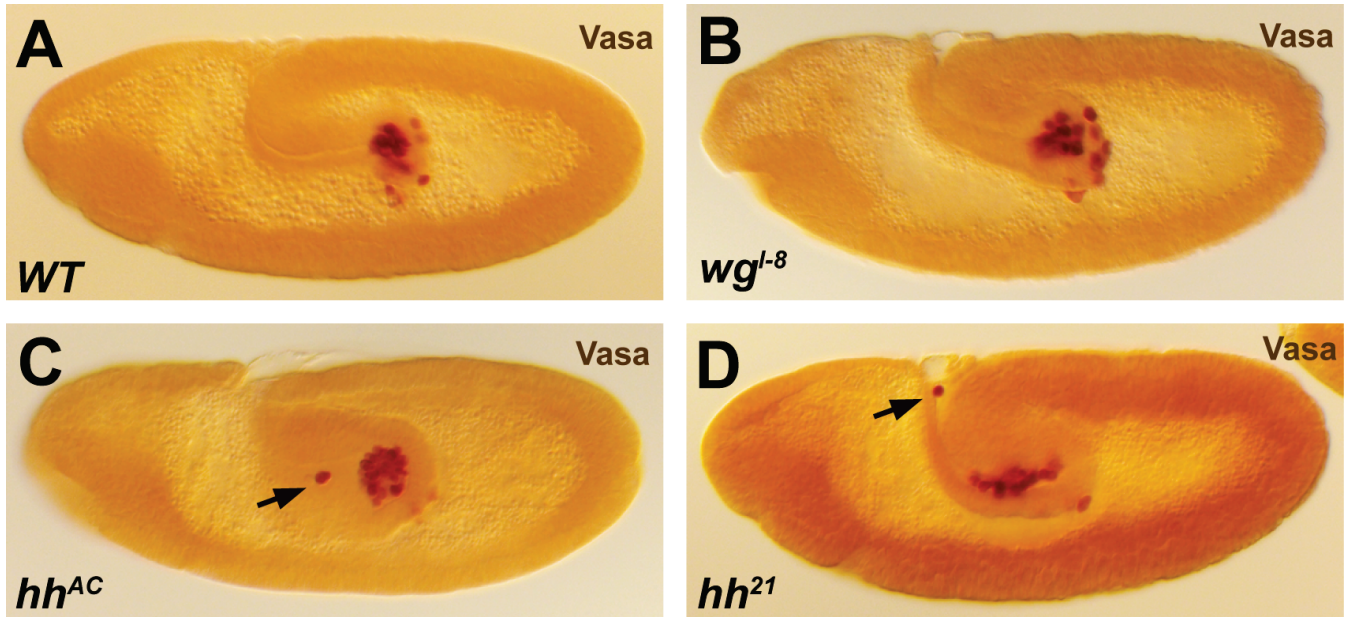

**Figure S7. Early GC navigation defect in *hh* mutant embryos.** (A) Vasa staining in a WT stage 10 embryo. (B-D) Vasa staining in stage 10 embryos mutant for *wg* (B) or *hh* (C,D). Black arrows highlight early mis-migrating GCs. Related to Figure 6.

| WT                                                     | Tre1 <sup>ΔG</sup> X Tre1 <sup>ΔG</sup> /Y (m-z) | Tre1 <sup>ΔG</sup> X GFP*/Y (m-z) | Tre1 <sup>ΔG</sup> /lacZ X Tre1 <sup>ΔG</sup> /Y (m-z) | Tre1 <sup>ΔG/ΔG</sup> X Tre1 <sup>ΔG</sup> /Y (m-z) | Tre1 <sup>ΔG/ΔG</sup> X Tre1 <sup>ΔG</sup> /Y (m-z) | Tre1 <sup>ΔG</sup> (m-z); nos-Gal4 | Tre1 <sup>ΔG</sup> (m-z); UAS-Tre1 | Tre1 <sup>ΔG</sup> (m-z); nos>Tre1 | Tre1 <sup>ΔG</sup> (m-z); nos>Tre1-HA | Tre1 <sup>ΔG</sup> (m-z); nos>Tre1-Flag | Tre1 <sup>ΔG</sup> (m-z); nos>Tre1-GFP | nos>Tre1-FLAG | nos>Tre1-GFP |
|--------------------------------------------------------|--------------------------------------------------|-----------------------------------|--------------------------------------------------------|-----------------------------------------------------|-----------------------------------------------------|------------------------------------|------------------------------------|------------------------------------|---------------------------------------|-----------------------------------------|----------------------------------------|---------------|--------------|
| WT                                                     | 687.79                                           | 450.759                           | 10.106                                                 | 655.487                                             | 790.002                                             | 329.245                            | 365.411                            | 32.618                             | 149.107                               | 61.36                                   | 279.705                                | 7.206         | 224.112      |
| Tre1 <sup>ΔG</sup> X Tre1 <sup>ΔG</sup> /Y (m-z)       | 4.40E-150                                        | 0.937                             | 470.532                                                | 3.395                                               | 22.438                                              | 25.539                             | 1.522                              | 340.886                            | 230.686                               | 267.131                                 | 29.58                                  | 376.444       | 48.155       |
| Tre1 <sup>ΔG</sup> X GFP*/Y (m-z)                      | 1.32E-98                                         | 0.626                             | 325.382                                                | 5.903                                               | 22.153                                              | 11.946                             | 0.933                              | 239.554                            | 142.601                               | 181.117                                 | 15.975                                 | 273.385       | 26.291       |
| Tre1 <sup>ΔG</sup> /lacZ X Tre1 <sup>ΔG</sup> /Y (m-z) | 0.00639                                          | 6.69E-103                         | 2.21E-69                                               | 463.208                                             | 565.849                                             | 310.149                            | 62.047                             | 6.719                              | 75.994                                | 186.384                                 | 2.243                                  | 154.654       |              |
| Tre1 <sup>ΔG/ΔG</sup> X Tre1 <sup>ΔG</sup> /Y (m-z)    | 4.60E-143                                        | 0.183                             | 2.11E-101                                              | 0.52                                                | 9.373                                               | 37.9                               | 4.634                              | 345.781                            | 238.185                               | 275.021                                 | 41.359                                 | 380.188       | 61.599       |
| Tre1 <sup>ΔG/ΔG</sup> X Tre1 <sup>ΔG</sup> /Y (m-z)    | 2.84E-172                                        | 0.000013                          | 0.000015                                               | 1.34E-123                                           | 0.009217                                            | 69.723                             | 21.995                             | 432.006                            | 332.824                               | 353.762                                 | 75.626                                 | 458.602       | 95.021       |
| Tre1 <sup>ΔG</sup> (m-z); nos-Gal4                     | 3.20E-72                                         | 2.85E-06                          | 0.002547                                               | 5.89E-09                                            | 7.24E-16                                            |                                    | 13.507                             | 154.494                            | 70.462                                | 105.936                                 | 1.755                                  | 187.929       | 3.946        |
| Tre1 <sup>ΔG</sup> (m-z); UAS-Tre1                     | 4.49E-80                                         | 0.467                             | 9.90E-02                                               | 0.099                                               | 0.000017                                            |                                    |                                    | 228.523                            | 131.832                               | 172.679                                 | 15.491                                 | 264.078       | 28.85        |
| Tre1 <sup>ΔG</sup> (m-z); nos>Tre1                     | 8.26E-08                                         | 9.49E-75                          | 9.60E-53                                               | 0.035                                               | 8.22E-76                                            | 1.55E-94                           | 2.38E-50                           |                                    | 35.557                                | 6.66                                    | 126.922                                | 9.022         | 105.563      |
| Tre1 <sup>ΔG</sup> (m-z); nos>Tre1-HA                  | 4.19E-33                                         | 8.28E-51                          | 1.08-31                                                | 3.15E-17                                            | 1.90E-52                                            | 5.30E-73                           | 5.00E-16                           | 2.36E-29                           | 1.90E-08                              |                                         | 48.762                                 | 66.919        | 38.451       |
| Tre1 <sup>ΔG</sup> (m-z); nos>Tre1-Flag                | 4.73E-14                                         | 9.84E-59                          | 4.69E-40                                               | 7.95E-06                                            | 1.91E-60                                            | 1.52E-77                           | 9.92E-24                           | 3.19E-38                           | 0.002159                              |                                         | 84.109                                 | 25.249        | 65.899       |
| Tre1 <sup>ΔG</sup> (m-z); nos>Tre1-GFP                 | 1.83E-61                                         | 3.77E-07                          | 0.00034                                                | 3.37E-41                                            | 1.04E-09                                            | 3.78E-17                           | 0.412                              | 0.000433                           | 2.75E-28                              | 5.44E-19                                |                                        | 161.836       | 4.342        |
| nos>Tre1-FLAG                                          | 0.027                                            | 1.80E-82                          | 4.32E-60                                               | 0.326                                               | 2.77E-83                                            | 2.61E-100                          | 1.56E-41                           | 4.53E-58                           | 2.94E-15                              | 3.29E-06                                | 7.10E-36                               |               | 135.31       |
| nos>Tre1-GFP                                           | 2.16E-49                                         | 3.49E-11                          | 1.43E-06                                               | 2.61E-34                                            | 4.21E-14                                            | 2.32E-21                           | 0.139                              | 5.44E-07                           | 1.19E-23                              | 4.47E-09                                | 0.114                                  | 4.15E-30      |              |

Supplementary Table Set 1. Statistical analyses of phenotypes in GC migration with different *Tre1* mutant conditions are shown. Related to Figure 1.

|                                                                     | WT       | <i>dpip5k</i> <sup>18</sup> | <i>dpip5k</i> <sup>30</sup> | <i>dpip5k</i> <sup>18</sup> , <i>sktI</i> <sup>Δ15</sup> | <i>matatub&gt;dpip5kRNAi</i> <sup>HMC05328</sup> | <i>matatub&gt;sktIRNAi</i> <sup>GL00072</sup> | <i>tre1</i> <sup>KO</sup> /+; UAS-HA-dPIP5K <sup>KD</sup> | <i>nos&gt;HA-dPIP5K</i> <sup>KD</sup> | <i>tre1</i> <sup>KO</sup> /+; <i>nos&gt;HA-dPIP5K</i> <sup>KD</sup> |
|---------------------------------------------------------------------|----------|-----------------------------|-----------------------------|----------------------------------------------------------|--------------------------------------------------|-----------------------------------------------|-----------------------------------------------------------|---------------------------------------|---------------------------------------------------------------------|
| WT                                                                  |          | 2.261                       | 0.963                       | 4.263                                                    | 61.964                                           | 1.156                                         | 0.00142                                                   | 1.174                                 | 27.136                                                              |
| <i>dpip5k</i> <sup>18</sup>                                         | 0.323    |                             | 3.445                       | 0.721                                                    | 56.827                                           | 5.524                                         | 1.916                                                     | 1.397                                 | 28.016                                                              |
| <i>dpip5k</i> <sup>30</sup>                                         | 0.618    | 0.179                       |                             | 5.307                                                    | 27.34                                            | 0.044                                         | 0.801                                                     | 3.329                                 | 10.512                                                              |
| <i>dpip5k</i> <sup>18</sup> , <i>sktI</i> <sup>Δ15</sup>            | 0.119    | 0.697                       | 0.492                       |                                                          | 39.87                                            | 7.578                                         | 3.784                                                     | 2.259                                 | 22.658                                                              |
| <i>matatub&gt;dpip5kRNAi</i> <sup>HMC05328</sup>                    | 3.50E-14 | 4.57E-13                    | 1.16E-06                    | 2.20E-09                                                 |                                                  | 65.635                                        | 50.146                                                    | 62.403                                | 8.312                                                               |
| <i>matatub&gt;sktIRNAi</i> <sup>GL00072</sup>                       | 0.561    | 0.063                       | 0.978                       | 0.023                                                    | 5.59E-15                                         |                                               | 0.865                                                     | 4.383                                 | 23.982                                                              |
| <i>tre1</i> <sup>KO</sup> /+; UAS-HA-dPIP5K <sup>KD</sup>           | 0.999    | 0.384                       | 0.67                        | 0.151                                                    | 1.29E-11                                         | 0.649                                         |                                                           | 1.106                                 | 22.313                                                              |
| <i>nos&gt;HA-dPIP5K</i> <sup>KD</sup>                               | 0.556    | 0.497                       | 0.189                       | 0.323                                                    | 2.81E-14                                         | 0.112                                         | 0.575                                                     |                                       | 31.645                                                              |
| <i>tre1</i> <sup>KO</sup> /+; <i>nos&gt;HA-dPIP5K</i> <sup>KD</sup> | 1.28E-06 | 8.25E-07                    | 0.005216                    | 0.000012                                                 | 0.016                                            | 6.20E-06                                      | 0.000014                                                  | 1.34E-07                              |                                                                     |

Supplementary Table Set 2. Statistical analyses of phenotypes in GC migration with *dpip5k* and *sktI* loss of functions are shown. Related to Figure 2.

|                                                                                   | WT       | <i>wasp</i> <sup>1</sup> | <i>wasp</i> <sup>3</sup> | <i>wasp</i> <sup>1</sup> / <i>wasp</i> <sup>3</sup> | <i>dpip5k</i> <sup>18</sup> | <i>dpip5k</i> <sup>18</sup> ; <i>wasp</i> <sup>1</sup> / <i>wasp</i> <sup>3</sup> | <i>dwip</i> <sup>S1946</sup> | <i>dwip</i> <sup>S1946</sup> /Df(2R)Exel7170 |
|-----------------------------------------------------------------------------------|----------|--------------------------|--------------------------|-----------------------------------------------------|-----------------------------|-----------------------------------------------------------------------------------|------------------------------|----------------------------------------------|
| WT                                                                                |          | 206.8                    | 152.49                   | 135.303                                             | 2.261                       | 146.434                                                                           | 43.229                       | 36.986                                       |
| <i>wasp</i> <sup>1</sup>                                                          | 1.20E-45 |                          | 5.358                    | 51.853                                              | 184.333                     | 4.202                                                                             | 122.032                      | 89.936                                       |
| <i>wasp</i> <sup>3</sup>                                                          | 7.71E-34 | 0.069                    |                          | 19.405                                              | 136.938                     | 71.244                                                                            | 51.853                       | 52.544                                       |
| <i>wasp</i> <sup>1</sup> / <i>wasp</i> <sup>3</sup>                               | 4.16E-30 | 5.50E-12                 | 0.000061                 |                                                     | 0.66                        | 121.767                                                                           | 35.057                       | 22.755                                       |
| <i>dpip5k</i> <sup>18</sup>                                                       | 0.323    | 9.39E-41                 | 1.84E-30                 | 3.20E-27                                            |                             | 133.238                                                                           | 40.846                       | 35.805                                       |
| <i>dpip5k</i> <sup>18</sup> ; <i>wasp</i> <sup>1</sup> / <i>wasp</i> <sup>3</sup> | 1.59E-32 | 0.122                    | 0.719                    | 0.000087                                            | 1.17E-29                    |                                                                                   | 68.58                        | 52.721                                       |
| <i>dwip</i> <sup>S1946</sup>                                                      | 4.10E-10 | 3.17E-27                 | 3.39E-16                 | 2.44E-08                                            | 1.35E-09                    | 1.28E-15                                                                          |                              | 0.084                                        |
| <i>dwip</i> <sup>S1946</sup> /Df(2R)Exel7170                                      | 9.30E-09 | 2.96E-20                 | 3.89E-12                 | 0.000011                                            | 1.68E-08                    | 3.56E-12                                                                          | 0.959                        |                                              |

Supplementary Table Set 3. Statistical analyses of phenotypes in GC migration with *wasp* and *dwip* mutant conditions are shown. Related to Figure 4.

|                                     | WT       | hh[Mrt]/+ | SmoRNAi <sup>HMC03577</sup> | matatub>SmoRNAi <sup>HMC03577</sup> | SmoRNAi <sup>GL01472</sup> | matatub>SmoRNAi <sup>GL01472</sup> | nos-Gal4 | UAS-GFP-Ptc | nos>Smo-GFP | nos>GFP-Ptc |
|-------------------------------------|----------|-----------|-----------------------------|-------------------------------------|----------------------------|------------------------------------|----------|-------------|-------------|-------------|
| WT                                  |          | 120.943   | 15.272                      | 191.907                             | 3.1                        | 126.971                            | 0.015    | 2.041       | 0.05        | 72.91       |
| hh[Mrt]/+                           | 5.47E-27 |           | 38.898                      | 16.352                              | 74.964                     | 6.695                              | 105.848  | 87.408      | 101.17      | 15.124      |
| SmoRNAi <sup>HMC03577</sup>         | 0.000483 | 3.58E-09  |                             | 86.391                              | 4.959                      | 55.6                               | 13.136   | 8.403       | 12.223      | 12.732      |
| matatub>SmoRNAi <sup>HMC03577</sup> | 2.13E-42 | 0.000281  | 1.74E-19                    |                                     | 133.928                    | 0.76                               | 171.797  | 149.383     | 165.689     | 61.936      |
| SmoRNAi <sup>GL01472</sup>          | 0.212    | 5.27E-17  | 0.084                       | 8.20E-30                            |                            | 89.074                             | 2.453    | 2.524       | 2.11        | 37.692      |
| matatub>SmoRNAi <sup>GL01472</sup>  | 2.68E-28 | 0.035     | 8.44E-13                    | 0.684                               | 4.55E-20                   |                                    | 115.235  | 98.631      | 111.433     | 31.928      |
| nos-Gal4                            | 0.992    | 1.04E-23  | 0.001404                    | 4.95E-38                            | 0.293                      | 9.49E-26                           |          | 1.679       | 0.00959     | 61.909      |
| UAS-GFP-Ptc                         | 0.36     | 1.05E-19  | 0.015                       | 3.65E-33                            | 0.283                      | 3.82E-22                           | 0.432    |             | 1.546       | 47.143      |
| nos>Smo-GFP                         | 0.975    | 1.07E-22  | 0.002217                    | 1.05E-36                            | 0.348                      | 6.35E-25                           | 0.995    | 0.462       |             | 58.432      |
| nos>GFP-Ptc                         | 1.47E-16 | 0.00052   | 0.001719                    | 3.55E-14                            | 6.54E-09                   | 1.17E-07                           | 3.60E-14 | 5.80E-11    | 2.05E-13    |             |

Supplementary Table Set 4. Statistical analyses of phenotypes in GC migration associated with loss of *hh* and *smo* expression and overexpression of GFP-Smo or GFP-Ptc are shown. Related to Figure 6.
